# Supplementary material for: The roles of two extracellular loops in proton sensing and permeation in human Otop1 proton channel
Source: PubMed Central journal article supplement (PMC9585144; doi:10.1038/s42003-022-04085-2), 2022-10-20

## **Supplementary Information**

### **The roles of two extracellular loops in proton sensing and permeation in human Otop1 proton channel**

Bin Li<sup>1,2</sup>, Yan Wang<sup>1,2</sup>, Alexis Castro<sup>1</sup>, Courtney Ng<sup>1</sup>, Zhifei Wang<sup>1</sup>, Haroon Chaudhry<sup>1</sup>, Zainab Agbaje<sup>1</sup>, Gabriella A. Ulloa<sup>1</sup>, Yong Yu<sup>1,\*</sup>

<sup>1</sup>Department of Biological Sciences, St. John's University, Queens, NY 11375, USA

<sup>2</sup>These authors contributed equally: Bin Li, Yan Wang

**\* To whom correspondence should be addressed:**

Yong Yu

Department of Biological Sciences, St. John's University, St. Albert Hall 210, 8000

Utopia Parkway, Queens, NY 11439, USA

Phone: 1 (718)-990-1654; Email: [yuy2@stjohns.edu](mailto:yuy2@stjohns.edu)

**a**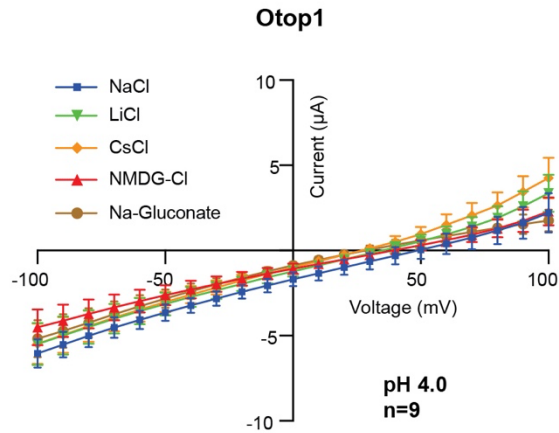**b**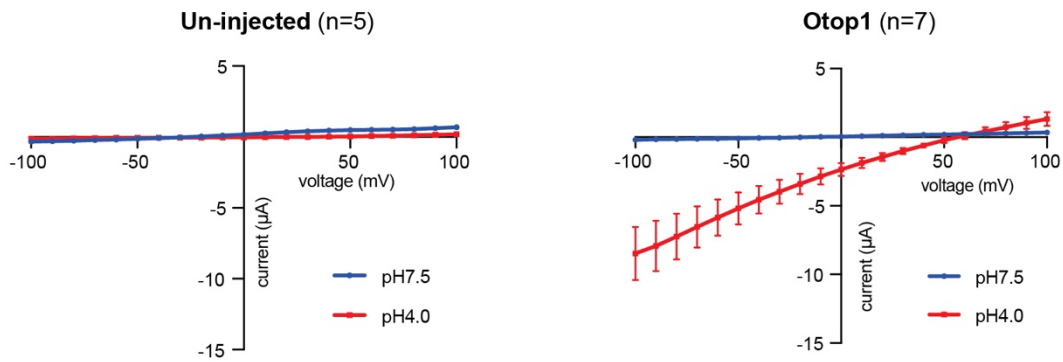

Currents in tetraethylammonium (TEA) methanesulfonate

**Supplementary Fig. 1 Acid-induced currents in Otop1-expressing oocytes were carried by protons conducted by the Otop1 channel.** **a** Currents at pH 4 in bath solutions containing 100 mM of different cations ( $\text{Na}^+$ ,  $\text{Li}^+$ ,  $\text{Cs}^+$ , and  $\text{NMDG}^+$ ) respectively, as well as in a bath solution containing 100 mM Na-Glutamate, without  $\text{Cl}^-$ . **b** Comparison of currents from un-injected oocytes and Otop1-expressing oocytes in pH 7.5 and pH 4. Bath solution contains 40 mM tetraethylammonium (TEA) methanesulfonate, 5 mM TEA chloride, 5 mM EGTA, and 100 mM HEPES or homoPIPES for pH 7.5 and 4, respectively.

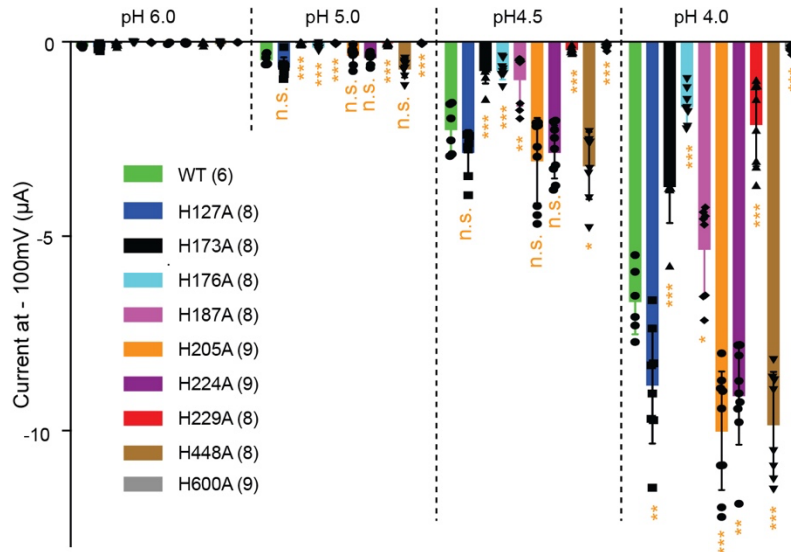

**Supplementary Fig. 2 The effects of mutating histidine residues on channel activity of the human Otop1 channel.** The scatter plot and bar graph showing the currents of the indicated WT and mutant Otop1 channels recorded at -100 mV at the indicated pHs. Data in the bar graphs are presented as mean  $\pm$  SD. Currents of the mutants were compared to that of the WT with Student's t-test (\* $P < 0.05$ , \*\* $P < 0.01$ , \*\*\* $P < 0.001$ , n.s.: no significance). Oocyte numbers for scatter plots and bar graphs are indicated in parentheses.

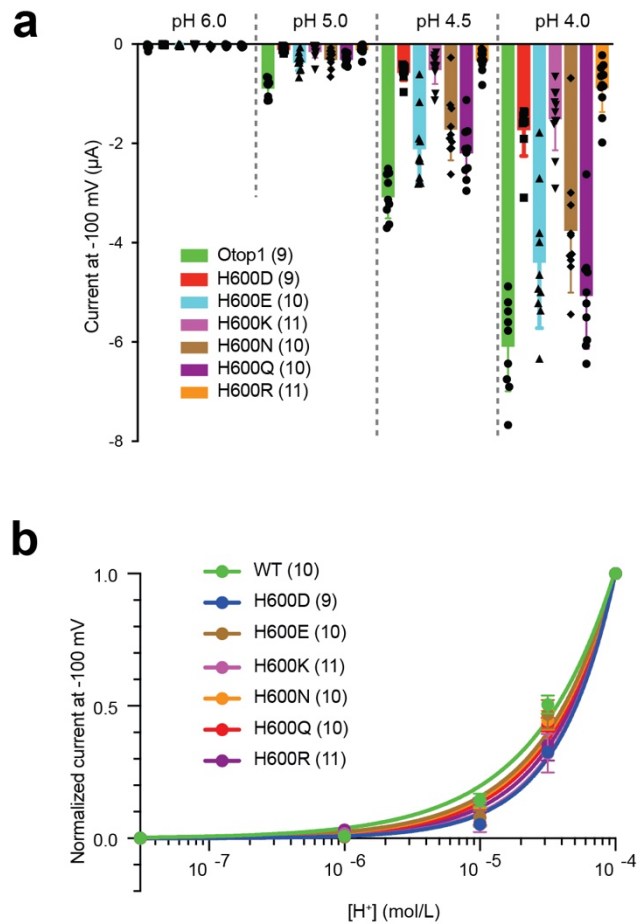

**Supplementary Fig. 3 The pH sensing of Otop1 is not significantly changed by mutations of H600.** **a** Scatter plot and bar graph showing the currents of the indicated channels recorded at -100 mV at the indicated pHs. Data in the bar graphs are presented as mean  $\pm$  SD. Oocyte numbers for scatter plots and bar graphs are indicated in parentheses. **b** Proton dose-response curves showing the acid sensitivity comparison between the WT and the indicated mutant channels. The currents of every oocyte at other pHs were normalized to the currents at pH 4 at -100 mV. The data were fitted by nonlinear regression with variable slope.

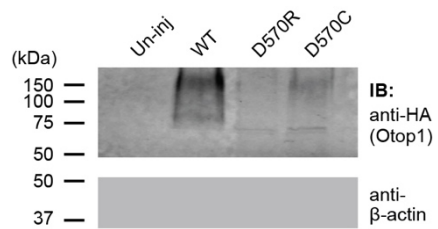

**Supplementary Fig. 4 Western blot of the surface biotinylated samples shows a weak but clear expression of the Otop1-D570C mutants on the plasma membrane of *Xenopus* oocytes.** The D570R mutant has a weaker surface expression compared to D570C. The surface samples are the same as the ones used in Fig. 5H but loaded with 1/3 more volume and blotted with a higher concentration of antibody.

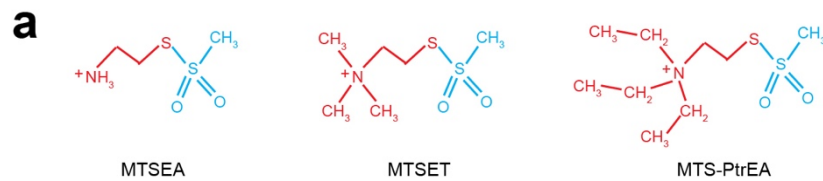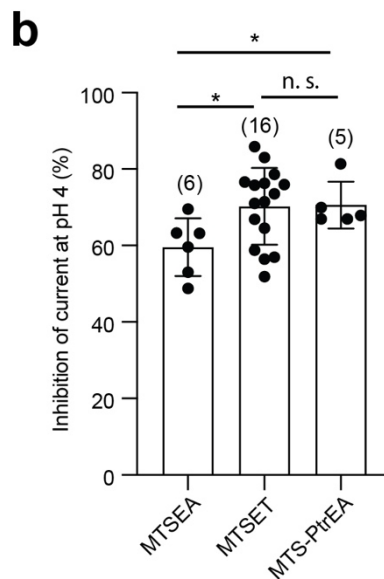

**Supplementary Fig. 5 The inhibition effects of three MTS reagents on channel activity of the Otop1-D570C mutant.** **a** Structures of the three MTS reagents used in our treatment. **b** The inhibition effects of indicated MTS reagents on channel activity of Otop1-D570C. Data were collected at pH 4.0 when oocytes were clamped at -100 mV. MTS reagents were applied at pH 7.5. Currents were compared with Student's t-test (\* $P < 0.05$ , n.s.: no significance). The numbers of oocyte numbers recorded in each group are indicated in parentheses.

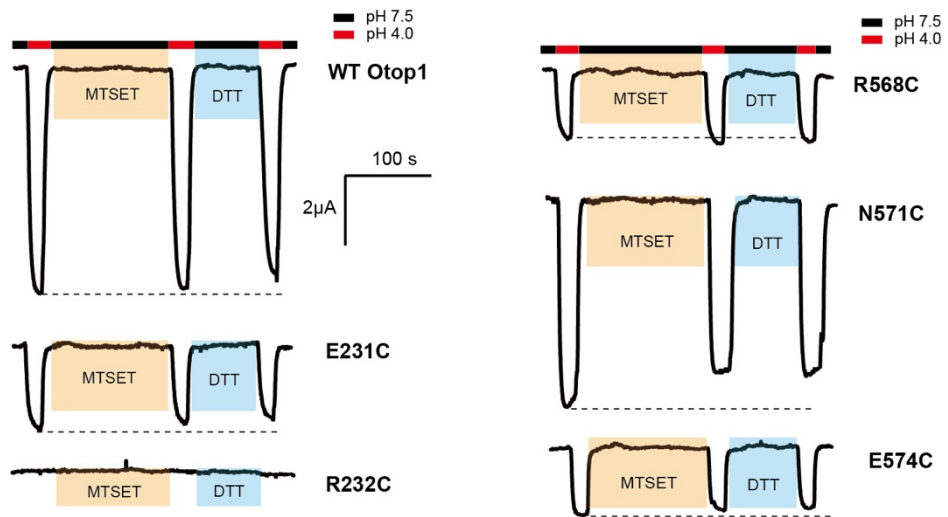

**Supplementary Fig. 6 The effects of the MTSET and DTT treatment on the indicated WT and mutant human Otop1 channels.** Gap-free recording showing the currents of WT and mutant Otop1 channels at pH 4 before and after 2 min treatment of 1 mM MTSET and 1 min treatment of 50 mM DTT. Oocytes were clamped at -60 mV. Dashed lines indicate the current sizes before MTSET treatment.

**a**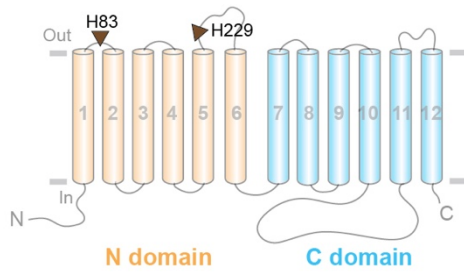**b**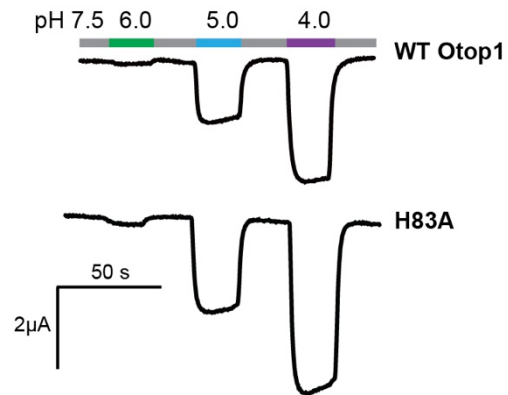

**Supplementary Fig. 7 The H83A mutant has normal proton sensitivity.** **a** Predicted positions of H83 and H229 in the topology structure of human Otop1. **b** Gap-free recording shows the currents of WT and H83A mutant at different pHs. Oocytes were clamped at -60 mV.



**Supplementary Fig. 8 Uncropped western blots**

Fig. 1f, anti-HA

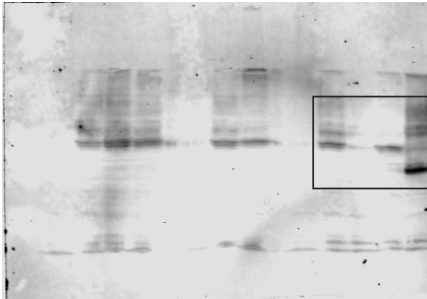

Fig. 1f, anti-actin

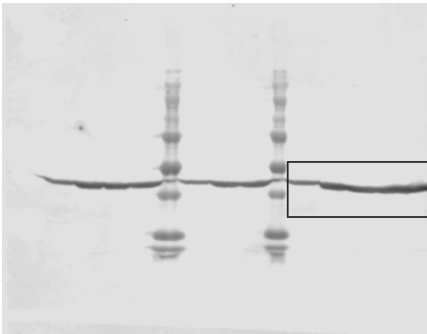

Fig. 1h, anti-HA

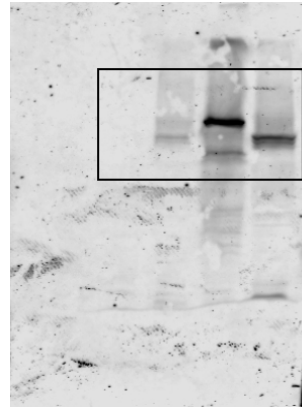

Fig. 1h, anti-actin

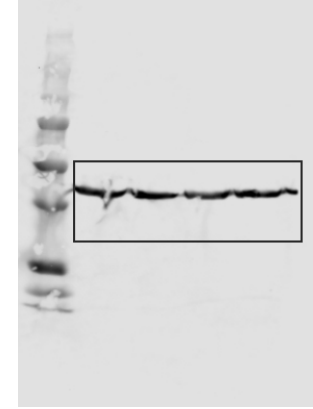

Fig. 2d, anti-HA

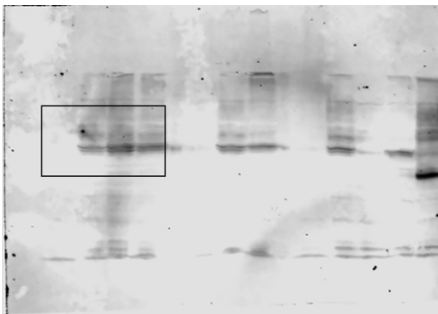

Fig. 2d, anti-actin

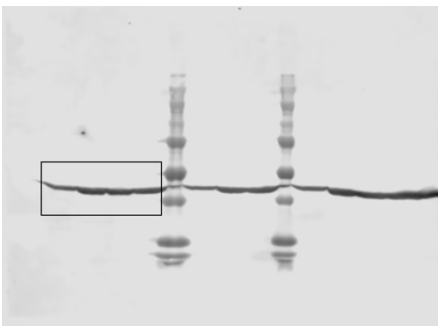

Fig. 2f, anti-HA

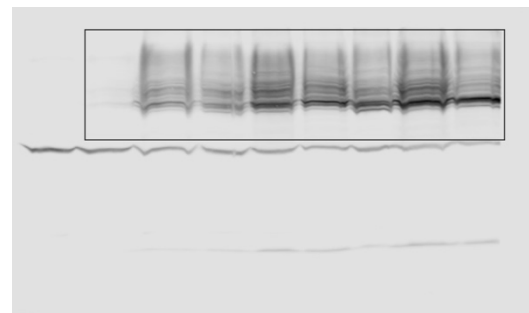

Fig. 2f, anti-actin

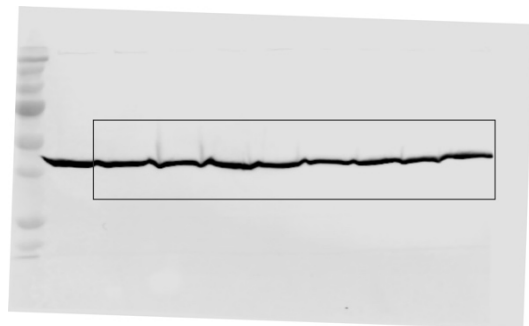

Fig. 2h, Lysates samples, anti-HA

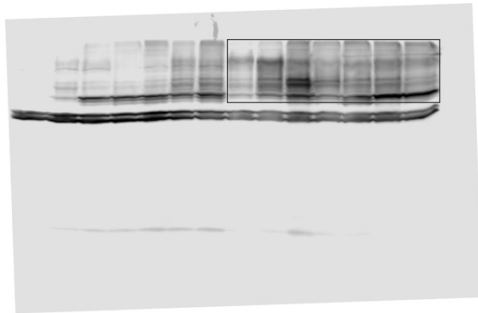

Fig. 2h, Surface samples, anti-HA

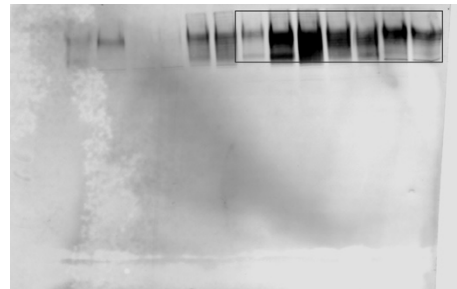

Fig. 2h, Lysates samples, anti-actin

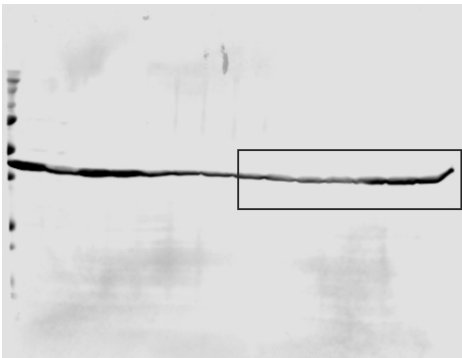

Fig. 2h, Surface samples, anti-actin

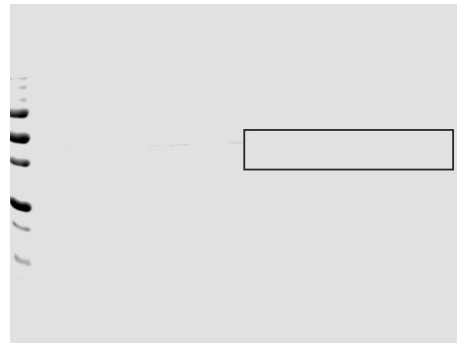

Fig. 4e, Surface samples, anti-HA

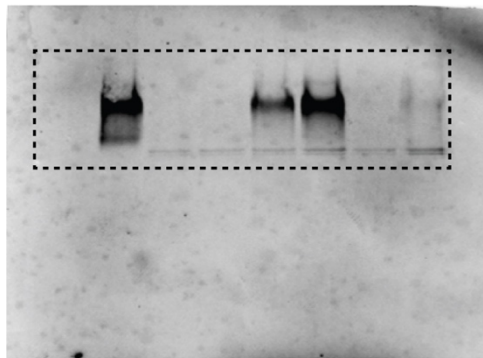

Fig. 4e, Surface samples, anti-actin

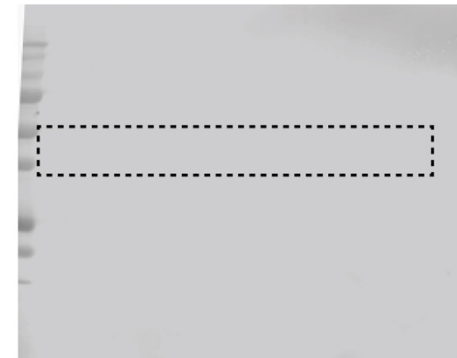

Fig. 4e, Lysate samples, anti-HA

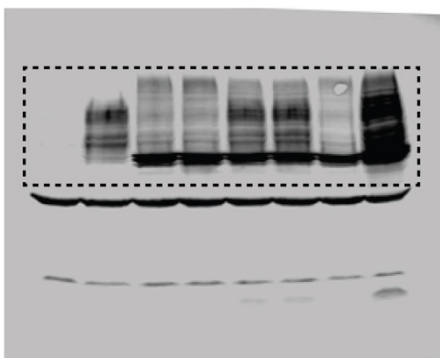

Fig. 4e, Lysate samples, anti-actin

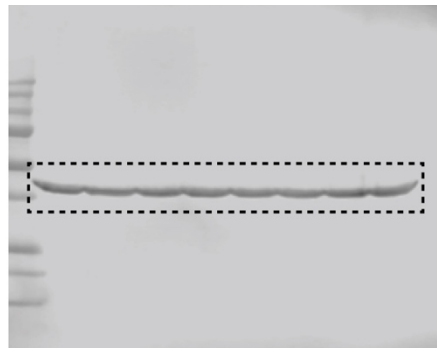

Fig. 5d, anti-HA

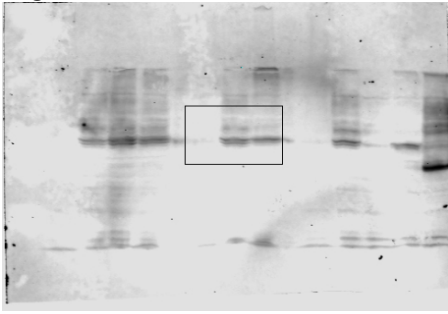

Fig. 5d, anti-actin

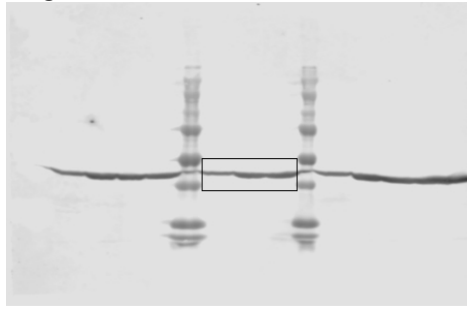

Fig. 5f, anti-HA

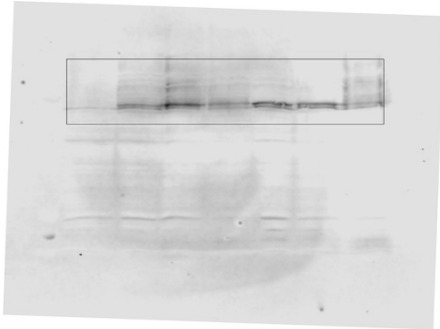

Fig. 5f, anti-actin

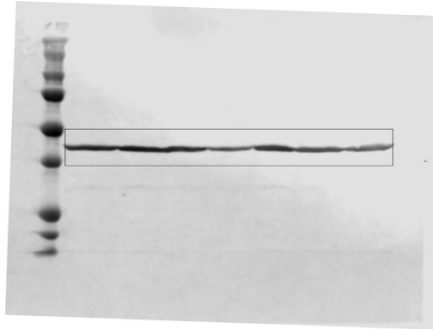

Fig. 5h, Lysate samples, anti-HA

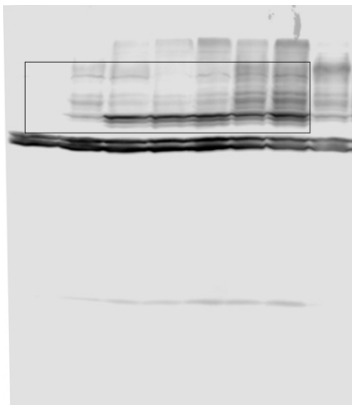

Fig. 5h, Lysate samples, anti-actin

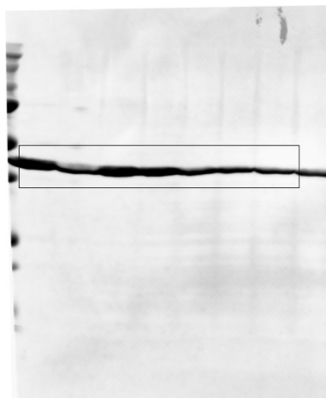

Fig. 5h, Surface samples, anti-HA

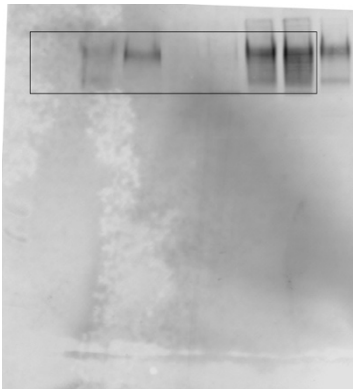

Fig. 5h, Surface samples, anti-actin

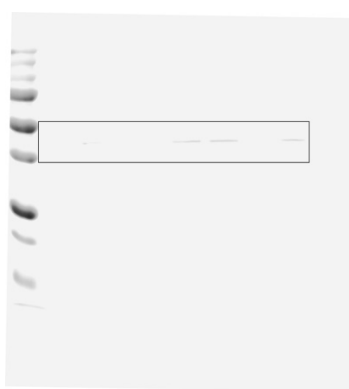

Supplementary Fig. 4, anti-HA

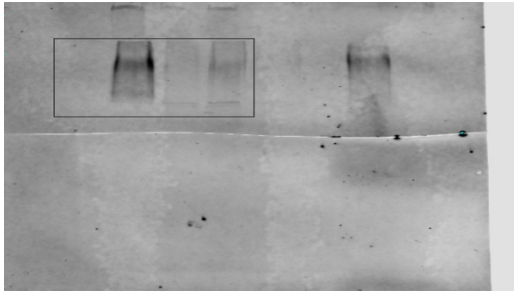

Supplementary Fig. 4, anti-actin

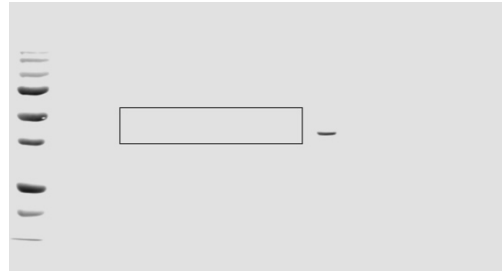

Supplement: 42003_2022_4085_MOESM1_ESM.pdf [file 42003_2022_4085_MOESM1_ESM.pdf]
