# Supplementary material for: The roles of two extracellular loops in proton sensing and permeation in human Otop1 proton channel
Source: PubMed Central journal article supplement (PMC9585144; doi:10.1038/s42003-022-04085-2), 2022-10-20
Supplement: 42003_2022_4085_MOESM2_ESM.pdf [file 42003_2022_4085_MOESM2_ESM.pdf]

## Description of Additional Supplementary Files

**File name:** Supplementary Data

**Description:** The source data behind the graphs in the paper.
